# Supplementary material for: Conformational Changes in Acetylcholine Binding Protein Investigated by Temperature Accelerated Molecular Dynamics
Source: PLOS journal article supplement (doi:10.1371/journal.pone.0088555), 2014-02-13
Supplement: S11 (10.1371/journal.pone.0088555.s011) [file journal.pone.0088555.s011]

**Table S1. Distances between lobeline and AChBP atoms.**

| Distance                     | P1+L          | P1conf1+L     | P1conf2+L     |
|------------------------------|---------------|---------------|---------------|
| LOB-CO/TRP147-HE1            | $6.9 \pm 0.6$ | $6.6 \pm 0.5$ | $6.8 \pm 0.6$ |
| LOB-NH/TRP147-CO             | $2.8 \pm 0.7$ | $4.1 \pm 1.0$ | $3.3 \pm 0.6$ |
| LOB-OH/SER146-CO             | $2.5 \pm 1.7$ | $1.8 \pm 0.2$ | $1.8 \pm 0.2$ |
| LOB-OH/TRP147-CO             | $3.8 \pm 1.2$ | $3.8 \pm 0.7$ | $3.5 \pm 0.5$ |
| LOB-piperidine/TRP147-indole | $4.9 \pm 0.3$ | $4.9 \pm 0.3$ | $4.9 \pm 0.3$ |
| LOB-CH3/TYR188-ring          | $4.6 \pm 0.7$ | $4.7 \pm 0.6$ | $4.6 \pm 0.7$ |
| LOB-CH3/TYR195-ring          | $3.7 \pm 0.3$ | $3.6 \pm 0.3$ | $3.6 \pm 0.3$ |

The values are obtained over the 150ns, 100ns and 100ns of MD simulations P1+L, P1conf1+L and P1conf2+L, respectively.
