# Supplementary material for: Conformational Changes in Acetylcholine Binding Protein Investigated by Temperature Accelerated Molecular Dynamics
Source: PLOS journal article supplement (doi:10.1371/journal.pone.0088555), 2014-02-13
Supplement: S12 (10.1371/journal.pone.0088555.s012) [file journal.pone.0088555.s012]

**Table S2. Distances between lobeline and AChBP atoms.**

| Distance                     | $\bar{\beta}_3^{-1}$ | $\bar{\beta}_5^{-1}$ | $\bar{\beta}_7^{-1}$ | $\bar{\beta}_{10}^{-1}$ |
|------------------------------|----------------------|----------------------|----------------------|-------------------------|
| LOB-CO/TRP147-HE1            | $6.9 \pm 0.8$        | $7.1 \pm 0.9$        | $7.3 \pm 1.3$        | $8.1 \pm 3.3$           |
| LOB-NH/TRP147-CO             | $2.9 \pm 0.7$        | $2.8 \pm 0.6$        | $3.0 \pm 1.2$        | $5.1 \pm 6.1$           |
| LOB-OH/SER146-CO             | $1.9 \pm 1.0$        | $2.5 \pm 1.7$        | $3.6 \pm 2.2$        | $6.3 \pm 5.3$           |
| LOB-OH/TRP147-CO             | $3.4 \pm 1.1$        | $3.9 \pm 1.3$        | $4.7 \pm 1.7$        | $7.2 \pm 5.7$           |
| LOB-piperidine/TRP147-indole | $4.9 \pm 0.3$        | $5.0 \pm 0.4$        | $5.1 \pm 0.8$        | $6.3 \pm 4.0$           |
| LOB-CH3/TYR188-ring          | $4.6 \pm 0.7$        | $7.6 \pm 3.4$        | $10.0 \pm 4.5$       | $13.7 \pm 7.2$          |
| LOB-CH3/TYR195-ring          | $3.7 \pm 0.4$        | $4.7 \pm 1.9$        | $5.6 \pm 2.7$        | $10.1 \pm 5.6$          |

The values are obtained over the TAMM simulations with  $\bar{\beta}^{-1}$  equal to 3, 5, 7 and 10 kcal/mol, started from the configuration at 40ns along the unbiased MD P1+L simulation. Lengths of the runs were 20ns, 30ns, 20ns and 10ns respectively.
